# Supplementary material for: Candida glabrata environmental stress response involves Saccharomyces cerevisiae Msn2/4 orthologous transcription factors
Source: PubMed Central journal article supplement (PMC2610386; doi:10.1111/j.1365-2958.2008.06301.x), 2008-06-16
Supplement: mmi0069-0603-SD1.pdf [file mmi0069-0603-SD1.pdf]

Figure S1

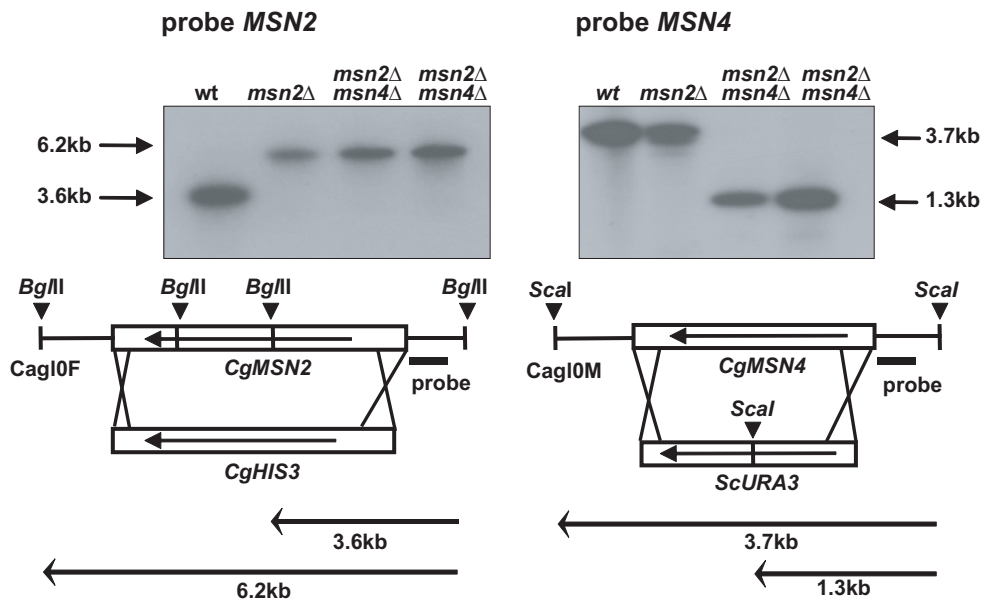



Figure S3

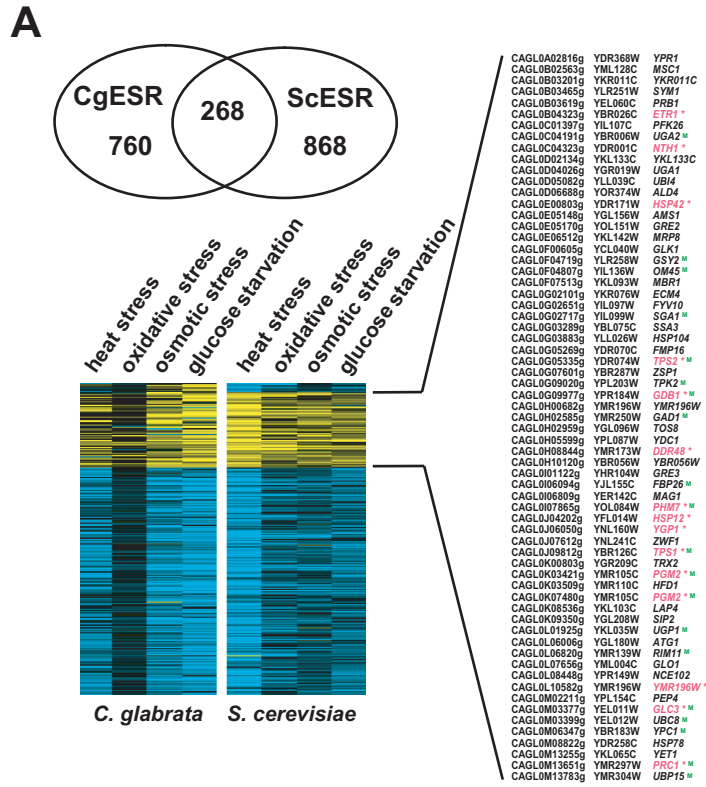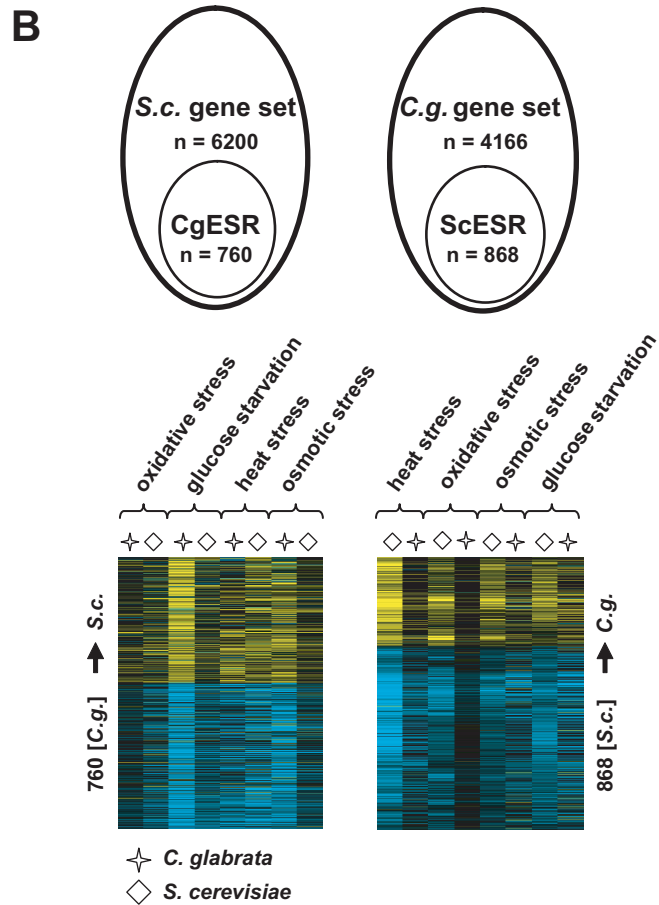

Figure S4

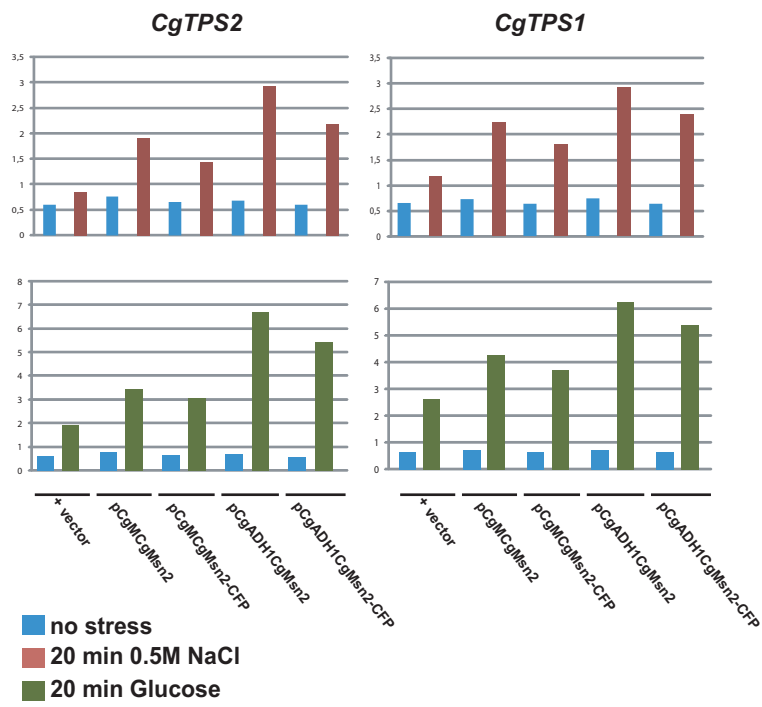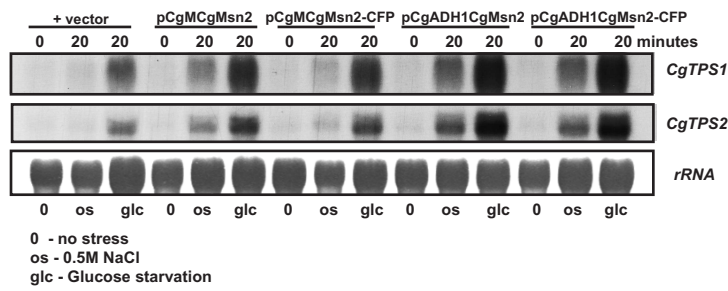

**Figure S1. Southern analysis of *CgMSN2* and *CgMSN4* deletion strains.** *CgMSN2* was replaced by *CgHIS3* and *CgMSN4* was replaced by *ScURA3*. Genomic DNA from wild type and the *msn2* $\Delta$  and *msn2* $\Delta$ *msn4* $\Delta$  deletion strains was digested with either *Bgl*II or *Scal*. Chromosomal restriction sites are indicated. DNA fragments were detected with radio-labeled probes as indicated. Replacement of *CgMSN2* with *CgHIS3* strain abolishes two *Bgl*II cleavage sites leading to a 6.2kb fragment instead of the 3.6kb wildtype fragment (left panel). Replacement of *CgMSN4* with *ScURA3* strain introduces a *Scal* cleavage site changing the 3.7kb wildtype fragment to a 1.3kb fragment (right panel).

**Figure S2. ESR gene expression levels of four different yeasts is similar. (A, B)** Pairwise overlap of stress induced orthologous genes between *C. glabrata*, *C. albicans*, *S. cerevisiae*, and *S. pombe*. Cut-off values are indicated. Expression levels of all four organisms were compared to each other during osmotic **(A)** and oxidative stress **(B)**. Specific induction levels were chosen (*C. glabrata* >2-fold after osmotic stress and >1.5-fold upon oxidative stress; *S. cerevisiae* >1.5-fold upon osmotic stress and oxidative stress; *C. albicans* >1,5-fold upon osmotic stress and oxidative stress; *S. pombe* >1,5-fold upon osmotic stress and oxidative stress) and used for a selection among all expressed genes (>1) of the four yeasts during oxidative and osmotic stress, respectively (*C. glabrata*: 945, 1126; *C. albicans*: 934 , 1058; *S. cerevisiae*: 956 , 360; *S. pombe*: 916 , 1065; genes oxidative, osmotic stress). **(C)** Common Msn2 response of orthologous genes. 13 genes are induced significantly (4-fold) by at least one of the tested conditions and by overexpression of ScMsn2 and CgMsn2.

**Figure S3. ESR genes are conserved between *C. glabrata* and *S. cerevisiae*. (A)** Comparison of genes comprising the CgESR of *C. glabrata* versus the ScESR of *S. cerevisiae*. A set of 268 genes shared between *C. glabrata* and *S. cerevisiae* has a similar stress induction profile for the conditions tested. Color code indicates common Msn2 regulated genes. CgMsn2

regulated genes are highlighted with a green letter (M), whereas genes from core response (see Figure 5B) are in red. **(B)** CgESR from *C. glabrata* (760 genes) is compared to the expression set of *S. cerevisiae* (~ 6200 genes) (left panel), whereas in the right panel the ScESR from *S. cerevisiae* (868 genes) was aligned against the expression set of *C. glabrata* (~ 4200 genes). Data from corresponding stress treatments were chosen: 0.4mM H<sub>2</sub>O<sub>2</sub> (*C.g.*) versus 0.32mM H<sub>2</sub>O<sub>2</sub> (*S.c.*), 20 minutes of glucose depletion (*C.g.*) versus a corresponding time point of a starvation time course (*S.c.*), temperature shift from 30°C to 42°C (heat shock, *C.g.*) versus shift from 25°C to 37°C (*S.c.*) and 0.5M NaCl (osmotic shock, *C.g.*) versus 1M Sorbitol (*S.c.*). *S. cerevisiae* data were extracted from (Gasch *et al.*, 2000)

**Figure S4. CgMsn2 and CgMsn2-CFP display similar rapid induction of transcription after applying stress. (A)** mRNA levels of *CgTPS1* and *CgTPS2* were quantified and normalized to large rRNA. **(B)** Northern blot analysis of *CgTPS1* and *CgTPS2* transcripts during 0.5M NaCl induced osmotic stress and glucose starvation. *Cg msn2Δmsn4Δ* transformed with empty vector and *Cg msn2Δmsn4Δ* transformed with pCgMCgMSN2-CFP, pCgMCgMSN2, pCgADH1CgMSN2-CFP and pCgADH1CgMSN2 were grown to exponential phase. Cells were treated with 0.5M NaCl or washed twice and incubated in YP without glucose. Samples for RNA extraction were taken at indicated time points. mRNA levels were visualized by hybridization of radio-labeled probes and autoradiography. Staining of rRNA was used as a loading control.

**Table S1 Oligonucleotides used.**

| Name        | Sequence                                  |
|-------------|-------------------------------------------|
| KIM2Sall    | GAGGTCGACAGCTTTGAAGTTACACATTCC            |
| KIM2NcoI    | GCCACCATGGAAGTTTGGCTCGTGGAAATTTGAG        |
| AgM2XhoI    | AGCTACTCGAGAGTGGCGCAGGCTCGTCG             |
| AgM2NcoI    | AAACGTCTCCCATGGCGCCCGGAAGGCTTTTTGGATCAAGC |
| CgM4Sall    | GTA CTGTCGACTCTAGTCTGGGCAATGAT            |
| CgM4NcoI    | CGTCCATGGAAGGTGCTAATGACCCTACGC            |
| ScM4Sall    | ATCGCGTCGACAGTACAACAGGATTGAACG            |
| ScM4NcoI    | ATTTCCATGGAAGAGTTCATCGAGATATCATAGC        |
| CgM2XhoI    | ATCCTCGAGAGCGACCAAAGGGCAGAAGGG            |
| CgM2NcoI    | GCTTTCCATGGATTGGCTATTTT GCCAGGATTCC       |
| CaMsn4-5    | GGTACGTCGACATGTCTCAAGAATTCCAACC           |
| CaMsn4-3    | GGCTTCCATGGAAGTAGTGATTGGTTTGGTTG          |
| ACT1-5      | ATGTGTAAGGCCGTTTC                         |
| ACT1-3      | AGGAAGATTGAGCAGCGG                        |
| TPS1-5      | ATGACACAGATTGAT                           |
| TPS1-3      | ATTCTGTAGATCTCG                           |
| TPS2-5      | CGCTACTAAGAAACA                           |
| TPS2-3      | GTAATCGTGAATCCA                           |
| UBP15-5     | ATGGGAACAAATGTTGA                         |
| UBP15-3     | TTATGAAGTTATGCCAC                         |
| MSN4-1      | AGTTTCTTGC GATACTATAG                     |
| MSN4-2      | CCGCTGCTAGGCGCGCCGTGAGATTG TACTGAGAGTGAC  |
| MSN4-3      | CACGGCGCGCCTAGCAGCGGAATAAACAAGACTTGCCAAT  |
| MSN4-4      | GTCAGCGGCCGCATCCCTGCTTAAAGTCTCGAGCCATTCTT |
| MSN4-5      | GCAGGGATGCGGCCGCTGACCTGTGCGGTATTTACACCCG  |
| MSN4-6      | TGTACAAGGAGCAGCATAAA                      |
| MSN2-5' M13 | ACACAGATCAACAAGAACAGCAGGAAACAGCTATGAC     |
| MSN2-3' M13 | TTGTGGAAGTACTTCCCGACCCAGTCACGACGTTGTA     |
| MSN2-5'3'   | GTCATAGCTGTTTCTGCTGTTCTTGTTGATCTGTGT      |
| MSN2-3'5'   | TACAACGTCGTGACTGGGGTCGGGAAGTACTTCCACA     |
| MSN2-5'5'   | GTGCGTTGAGAGTTGTCAGCC                     |
| MSN2-3'3'   | CCAGGTTAGCCTTGTGATGC                      |

|                 |                                          |
|-----------------|------------------------------------------|
| 5' ExMSN4-Ctrl1 | TCACGCCGTGCGAACTC                        |
| URA-Ctrl2       | TGCTGGCCGCATCTTCT                        |
| 3' ExMSN4-Ctrl3 | TCTCTTTCGGGGGCATC                        |
| URA-Ctrl4       | TAGTCCTGTTGCTGCCA                        |
| 5' ExMSN2-Ctrl1 | CCCGTTTACTCAACAATGAGAC                   |
| HIS-Ctrl2       | GACACGTAGACTAGCCACAATATC                 |
| 3' ExMSN2-Ctrl3 | TAAGTTCATTGGTCTCTCGG                     |
| HIS-Ctrl4       | CACTCTACGTAGCAGGCGACCC                   |
| CgAdhPro-SphI   | AGATGCATGCCAACTTCACAAACACAAACA           |
| CgAdhPro-SacII  | CGCACCGCGGTGTTTATGTGTTTTTGCAG            |
| SphI-msn2nat    | AGATGCATGCTATTTTATAGAACAGTAACG           |
| SacII-msn2nat   | CGCACCGCGGCTGTTCTTGTGATCTGTGT            |
| 5-SASA          | GGCCTCTGCTAGAAATGCTATTGCACACGGTGTGCGACTT |
| 3-SASA          | AAGTCGACACCGTGTGCAATAGCATTCTAGCAGAGGCC   |
| CgMsn2Cfp-SacII | CGCACCGCGGATGACGGTCGACCAGGAGCCT          |
| CgMsn2Cfp-Nsil  | AGAGCATGCATTTATGGGCGGCCGCTCTTGTA         |
| CgMsn2-Cfp1Sall | TTTGTCGACCAGGAGCCTAGCTCGTGG              |
| CgMsn2-Cfp2NcoI | TTAGCCCATGGATTCTTTAGTTGTGGAAGTAC         |
| IPP1 fwd        | CCCTTGTACGCTGACAAGG                      |
| IPP1 rev        | GCTTCACCGGAGAAGGC                        |
| Re-Sall-5       | GCGGAAGGTGGGGATCGTCGACGTTTCTAGTG         |
| Re-Sall-3       | CACTAGAAACGTCGACGATCCCCACCTCCGC          |
